# Supplementary material for: Fabrication of cerebral aneurysm simulator with a desktop 3D printer
Source: PubMed Central journal article supplement (PMC5434791; doi:10.1038/srep44301), 2017-05-17
Supplement: srep44301-s2.pdf [file srep44301-s2.pdf]

## Supplementary Information

### **Fabrication of cerebral aneurysm simulator with a desktop 3D printer**

Yu Liu<sup>1,2,‡</sup>, Qing Gao<sup>1,2,‡</sup>, Song Du<sup>3</sup>, ZiChen Chen<sup>1</sup>, JianZhong Fu<sup>1,2</sup>, Bing Chen<sup>4\*</sup>,  
ZhenJie Liu<sup>4</sup>, Yong He<sup>1,2\*</sup>

*(1. State Key Laboratory of Fluid Power and Mechatronic Systems, School of Mechanical Engineering, Zhejiang University, Hangzhou 310027, China*

*2. Key Laboratory of 3D Printing Process and Equipment of Zhejiang Province, School of Mechanical Engineering, Zhejiang University, Hangzhou 310027, China*

*‡These two authors contributed equally to this work.*

*3. Department of Neurosurgery, Second Affiliated Hospital, School of Medicine, Zhejiang University, Hangzhou 310009, China.*

*4. Department of Vascular Surgery, Second Affiliated Hospital, School of Medicine, Zhejiang University, Hangzhou, 310009, China*

*\*Correspondence to: Bing Chen, e-mail: [cbobc@163.com](mailto:cbobc@163.com) or Yong He, e-mail: [yongqin@zju.edu.cn](mailto:yongqin@zju.edu.cn)*

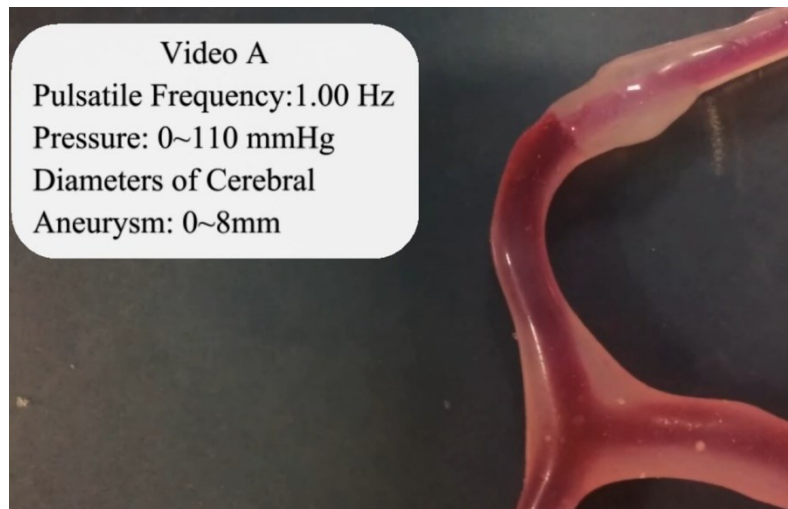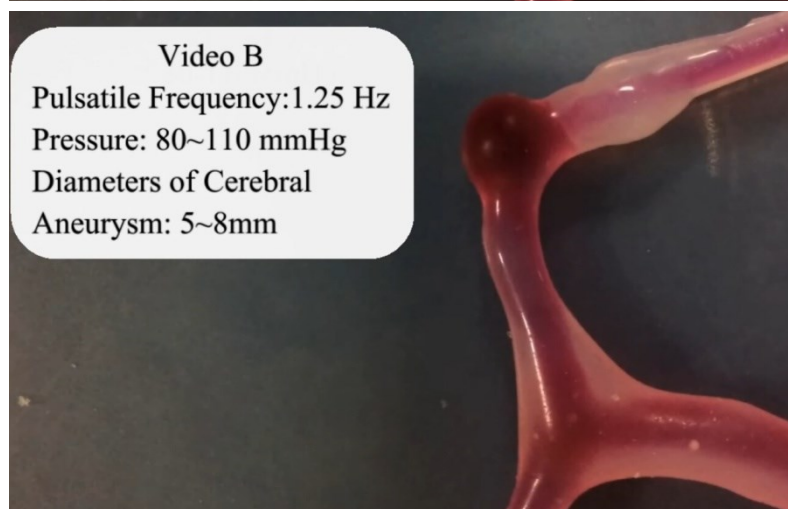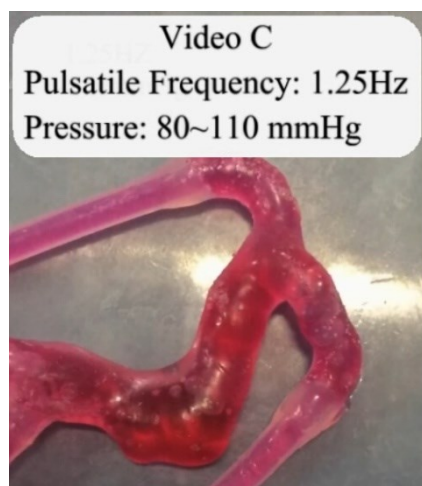

**Supplementary Video.** (see **Supplementary\_Video.avi** for the entire video)

**The pulsatile frequency and the maximum diameters of cerebral aneurysm:** In the video A, the diameters of cerebral aneurysm range from 0~8 mm with the conditions that the pulsatile frequency of 1Hz and pressure of 0~110 mmHg. In the video B, the diameters of cerebral aneurysm range from 5~8 mm with the conditions that the pulsatile frequency of 1.25Hz and pressure of 80~110 mmHg. The blister-like dilation in vascular model of the video C is irregular with the conditions that the pulsatile frequency of 1.25Hz and pressure of 80~110 mmHg.
